# Supplementary material
Source: PubMed Central journal article supplement (PMC4197088)
Supplement: supp_127.20.4457_JCS153437.pdf [file supp_127.20.4457_JCS153437.pdf]

1 Supplementary material.

Supplementary Figure 1

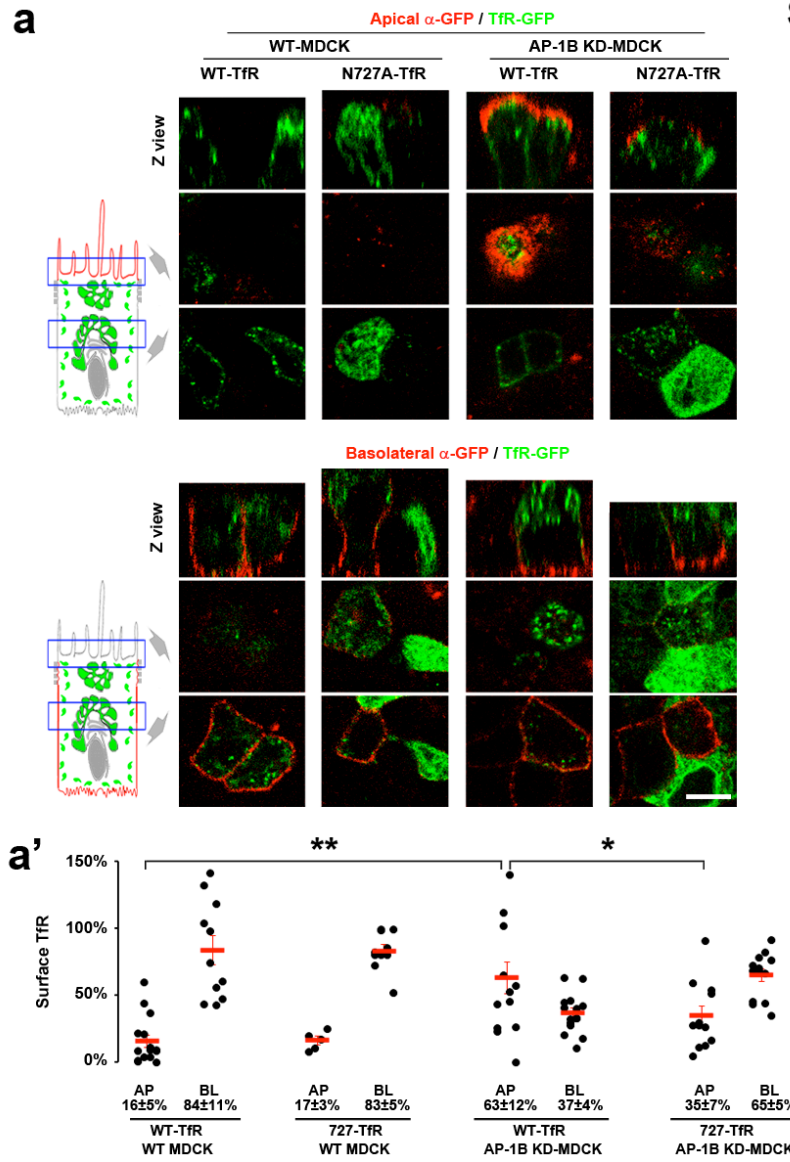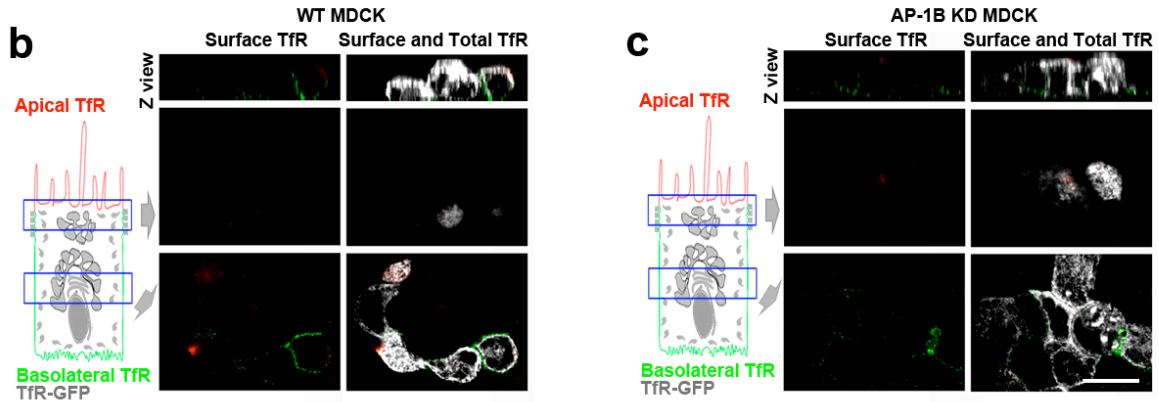

3 **Supplementary Figure 1. Mutation of the N727 glycan signal reduces half of apical TfR localization,**  
4 **whereas mutation of all glycosylation sites causes intracellular retention, in AP-1B KD MDCK cells.**  
5 **(a)** Polarized WT (left) and AP-1B KD (right) MDCK cells were transiently transfected with either WT or  
6 N727A TfR-GFP (green). SeTau647-labeled rabbit anti-GFP antibodies ( $\alpha$ -GFP, red) were applied either  
7 to the apical (top) or basolateral (bottom) chamber of separate transwell filters. **(a')** Cells from  
8 experiments represented in (a) were quantified for the apical or basolateral  $\alpha$ -GFP signal using the  
9 fluorescent signal of each PM domain. Circles correspond to individual cells obtained from different  
10 experiments and red lines indicate the mean. \* $p < 0.05$ , \*\*  $p < 0.001$ .  
11 Polarized WT **(b)** and AP-1B KD **(c)** MDCK cells were transfected with a TfR-GFP construct mutated in  
12 all four glycosylation sites of TfR (white). Cells were subjected to surface immunostaining of the apical  
13 and basolateral TfR (without permeabilizing the cells) using anti anti-GFP primary antibodies and anti-  
14 rabbit-IgG secondary antibodies labeled with Alexa Fluor 568 (red) or 647 (green) in the apical and  
15 basolateral chambers, respectively. Note that there is virtually no signal of apical or basolateral mutant  
16 TfR-GFP (left panels) although this mutant is highly expressed, as evidenced by the GFP signal (right  
17 panels). Scale: 10  $\mu\text{m}$ .

# Supplementary Figure 2

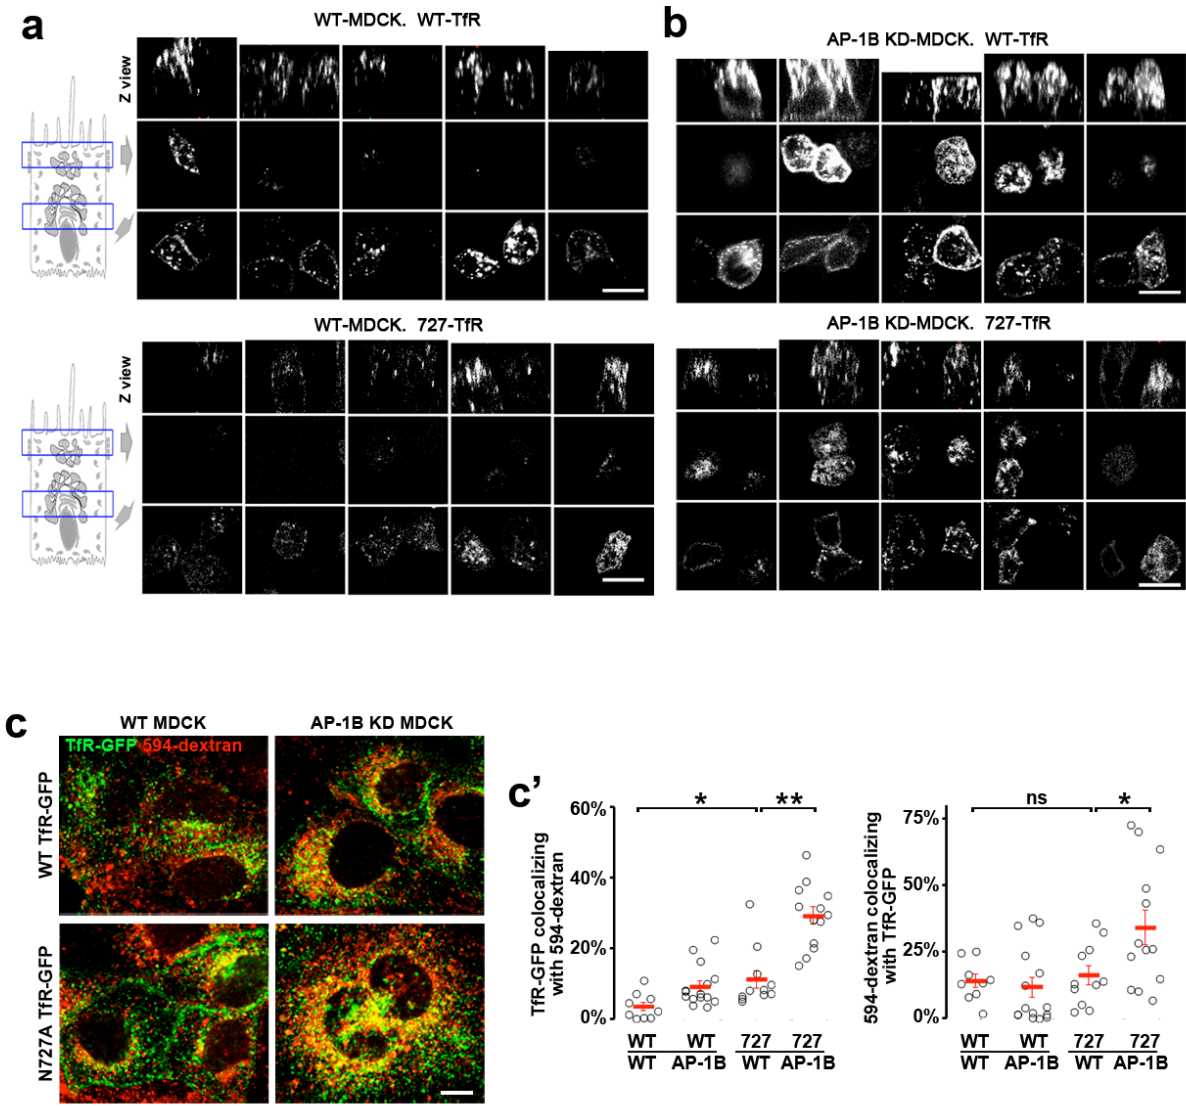

18  
 19 **Supplementary Figure 2. N727A TfR-GFP is targeted to the lysosomes in non-polarized AP-1B KD**  
 20 **MDCK cells. (a and b) GFP signal of the cells displayed in the transcytosis assay of figure 2 confirms**

21 efficient transfection with WT TfR-GFP or N727A TfR-GFP constructs in polarized WT **(a)** and AP-1B  
22 KD **(b)** MDCK cells. Comparison of this and figure with figure 2 reveals that only transfected cells bound  
23 fluorescent antibodies. Scale: 10  $\mu$ m. **(c)** Non-polarized WT and AP-1B KD MDCK cells were  
24 nucleofected with either WT or N727A TfR-GFP and stained for lysosomes with 60 minutes uptake of  
25 Alexa594-labeled 10 kDa dextran (594-dextran, red), followed by 60 minutes chase in dextran-free  
26 medium. **(c')** Cells from experiments represented in (c) were quantified for the percentage of pixels of  
27 TfR-GFP colocalizing with 594-dextran (left) and the percentage of pixels of 594-dextran colocalizing  
28 with TfR-GFP (right). Circles correspond to individual cells obtained from different experiments and red  
29 lines indicate the mean. ns not significant, \*  $p < 0.05$ , \*\*  $p < 0.001$ . Scale: 10  $\mu$ m.  
30

# Supplementary Figure 3

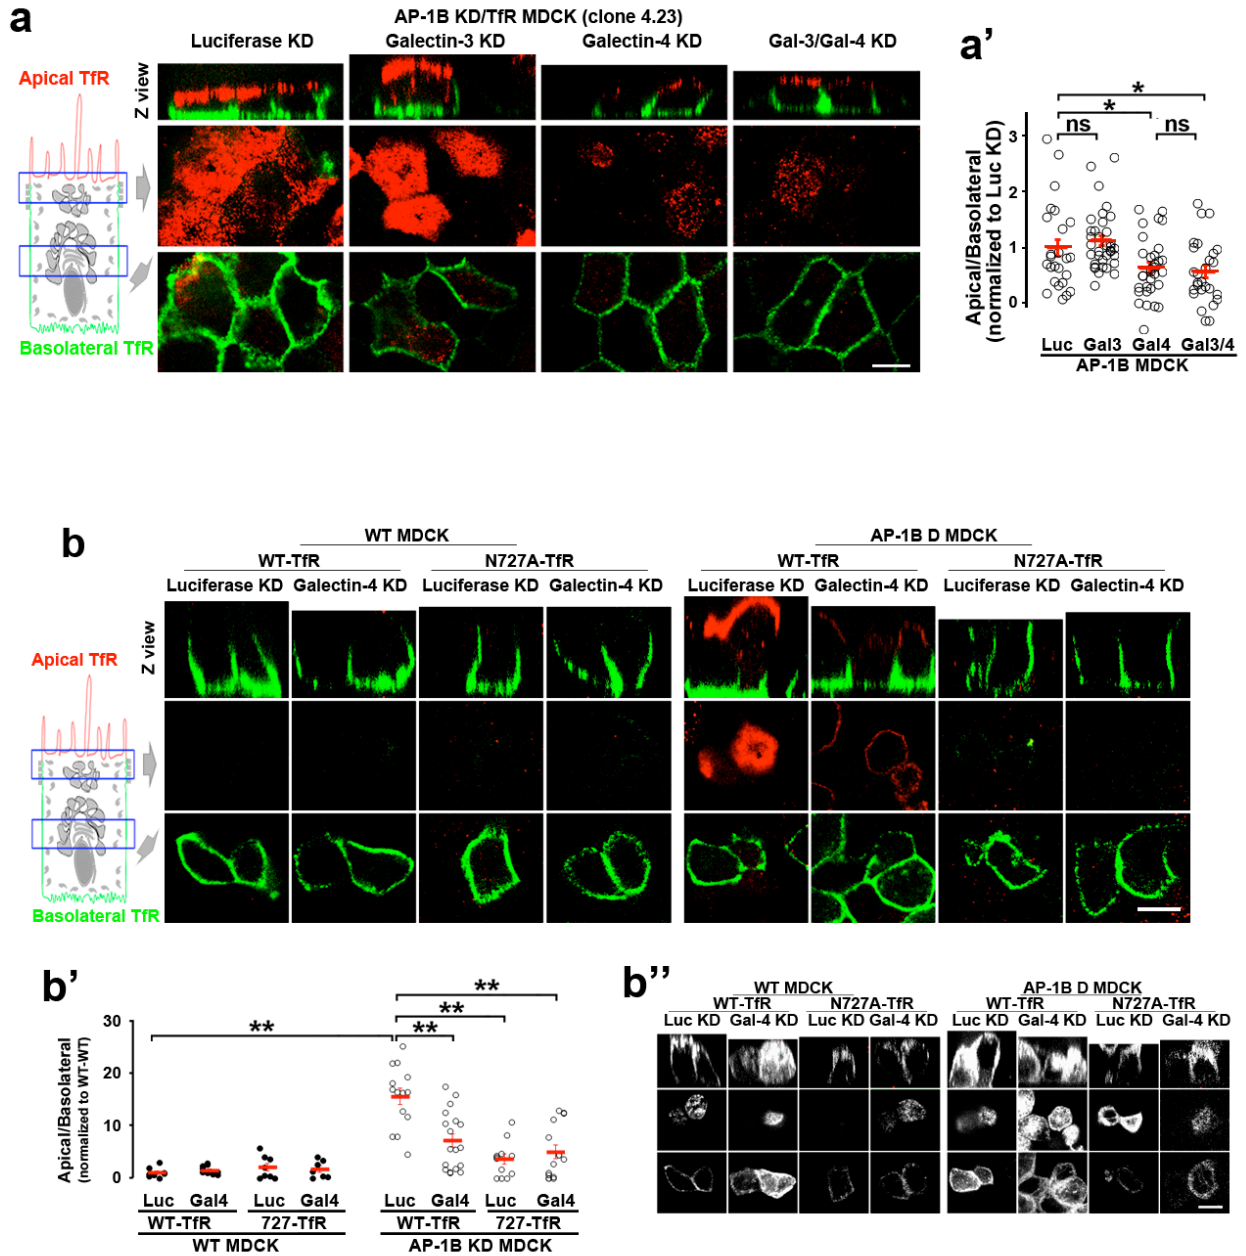

31

32 **Supplementary Figure 3. Galectin-4 mediates TfR apical sorting in different clones of AP-1B**

33 **KD/TfR MDCK cells, without affecting basolateral polarity of N727A TfR-GFP. (a) A different**

34 clone of human TfR-expressing AP-1B KD MDCK cells to that used in figure 5 was knocked-down for  
35 luciferase, galectin-3 and/or galectin-4 and polarized on transwell filters. Apical and basolateral TfR was  
36 immunostained (without permeabilizing the cells), using anti-human TfR primary antibodies that  
37 recognizes TfR's luminal domain and anti-mouse-IgG secondary antibodies labeled with Alexa Fluor 568  
38 (red) or 647 (green) in the apical and basolateral chambers, respectively. **(a')** Cells from experiments  
39 represented in (a) were quantified for the apical/basolateral ratio using the fluorescent signal of each PM  
40 domain. **(b)** Polarized WT (left) and AP-1B KD (right) MDCK cells were transiently transfected with WT  
41 or N727A TfR-GFP and knocked-down for luciferase or galectin-4. Cells were immunostained for surface  
42 TfR-GFP (without permeabilizing the cells) using anti-GFP primary antibodies and anti-rabbit-IgG  
43 secondary antibodies labeled with Alexa Fluor 568 (red) or 647 (green) in the apical and basolateral  
44 chambers, respectively. **(b')** Cells from experiments represented in (b) were quantified for the  
45 apical/basolateral ratio using the fluorescent signal of each PM domain. **(b'')** GFP signal of the cells  
46 displayed in (b) confirms efficient transfection with WT TfR-GFP or N727A TfR-GFP constructs. Circles  
47 correspond to individual cells obtained from different experiments and red lines indicate the mean. ns not  
48 significant, \*  $p < 0.05$ , \*\*  $p < 0.001$ . Scale: 10  $\mu\text{m}$ .

49

# Supplementary Figure 4

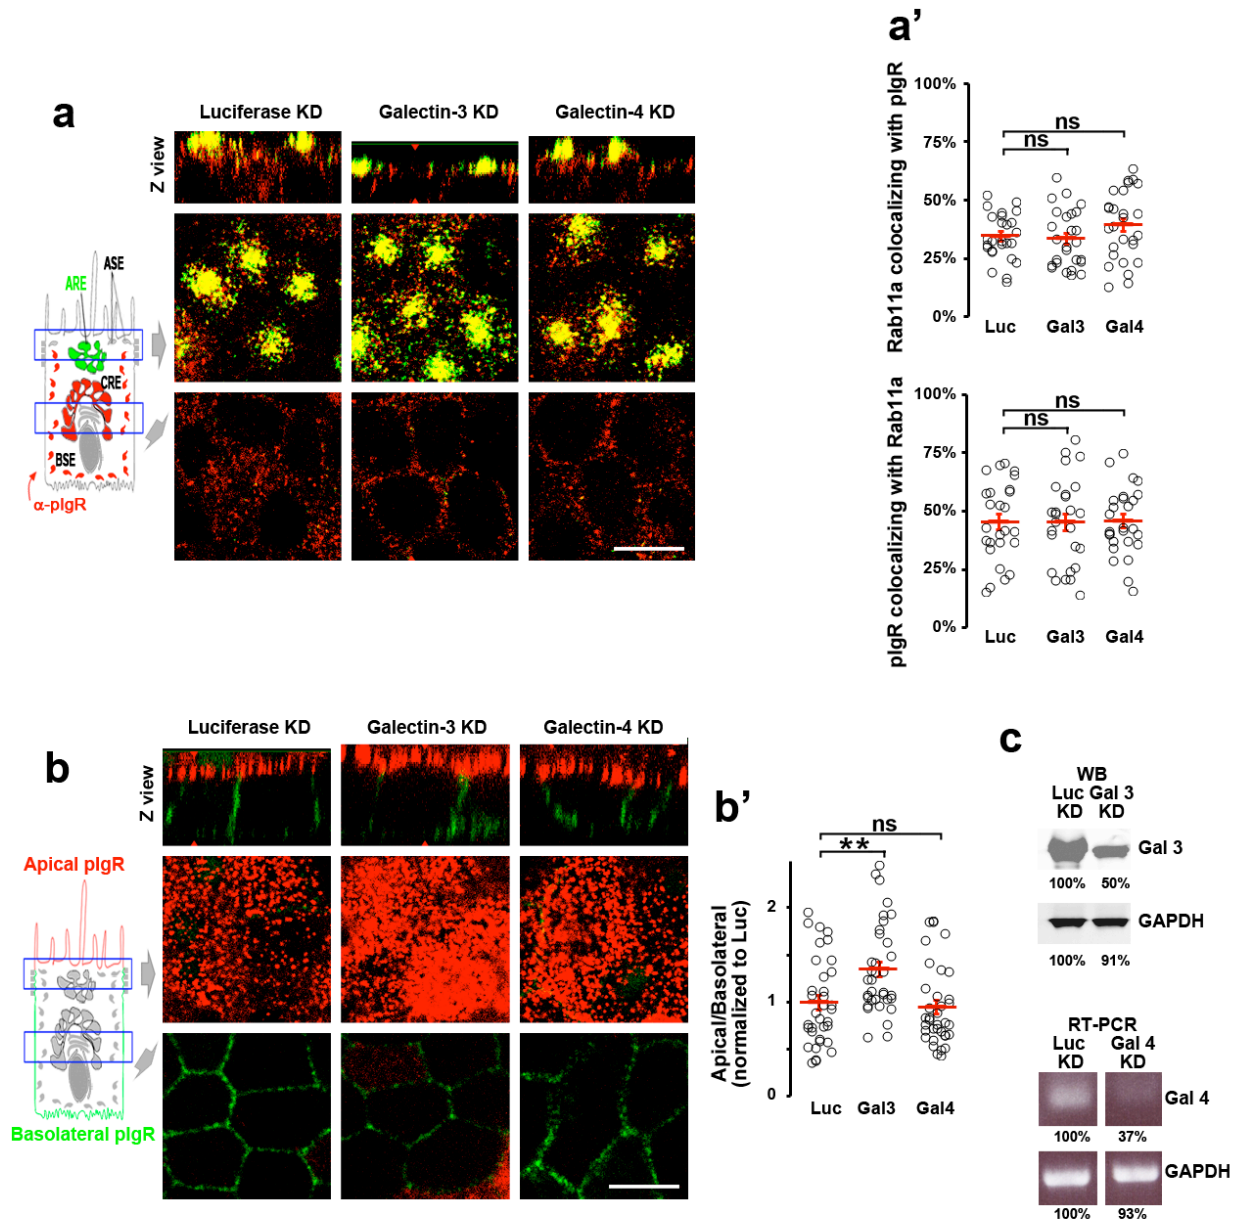

50 **Supplementary Figure 4. Galectin-3 or galectin-4 knock-down does not inhibit pIgR apical**  
 51 **transcytosis.** Polarized T23 cells (MDCK cells stably expressing the pIgR) were knocked-down for  
 52



53 luciferase, galectin-3 or galectin-4 and polarized on transwell filters. **(a)** Cells were incubated  
54 basolaterally with sheep anti-pIgR (60 minutes-4°C plus 30 minutes-37°C) and immunostained for the  
55 ARE marker rab11a. **(a')** Cells from experiments represented in (a) were quantified for the percentage of  
56 pixels of rab11a colocalizing with pIgR (top) and the percentage of pixels of pIgR colocalizing with  
57 rab11a (bottom). **(b)** Surface immunostaining of the apical and basolateral pIgR (without permeabilizing  
58 the cells) using sheep anti-pIgR primary antibodies and anti-sheep-IgG secondary antibodies labeled with  
59 Alexa Fluor 568 (red) or 647 (green) in the apical and basolateral chambers, respectively. **(b')** Cells from  
60 experiments represented in (b) were quantified for pIgR apical/basolateral ratio using the fluorescent  
61 signal of each PM domain. **(c)** Western Blot analysis of galectin-3 expression (top) and RT-PCR analysis  
62 of galectin-4 expression (bottom). Circles correspond to individual cells and red lines indicate the mean.  
63 ns not significant, \*\*  $p < 0.001$ . Scale: 10  $\mu\text{m}$ .  
64
